# Supplementary material for: Viruses and Protists Induced-mortality of Prokaryotes around the Antarctic Peninsula during the Austral Summer
Source: PubMed Central journal article supplement (PMC5332362; doi:10.3389/fmicb.2017.00241), 2017-03-02
Supplement: Table1.pdf [file Table1.pdf]

Table 1SM. Location, stations (St), date, situation (latitude S, longitude W), depth (m), temperature (°C), salinity, Units of Fluorescence (UF), pico/nanophototrophic flagellates (PF, 10<sup>3</sup> cel ml<sup>-1</sup>) Prokaryotic and viral abundance (PA, 10<sup>5</sup> cel ml<sup>-1</sup> and VA, 10<sup>6</sup> vir ml<sup>-1</sup>), prokaryotic heterotrophic production (PHP, µg C L<sup>-1</sup>d<sup>-1</sup>), pico/nanoheterotrophic flagellates (HF, 10<sup>3</sup> cel ml<sup>-1</sup>), viral lytic production (VP<sub>L</sub>, 10<sup>7</sup> vir ml<sup>-1</sup>d<sup>-1</sup>), Lysogeny (VP<sub>Lyso</sub>10<sup>7</sup> vir ml<sup>-1</sup>d<sup>-1</sup>), and rates of lysed cells (RLC, 10<sup>4</sup> cel ml<sup>-1</sup> d<sup>-1</sup>), and grazing rates (GZ, 10<sup>4</sup> cel ml<sup>-1</sup> d<sup>-1</sup>). nd: not detected, -: no data. In bold: depth corresponding to Deep Fluorescence Maximum (DFM). Grey areas correspond to the stations where mortality rates were measured. SE: standard error, SD: standard deviation of duplicates.

| Site | St | Date  | Lat      | Long      | Depth     | T    | S    | UF  | PF  | PA  | VA   | PHP±SE  | HF  | VP <sub>L</sub> ±SD | VP <sub>Lyso</sub> ±SD | RLC±SD    | GZ±SD    |   |   |   |   |
|------|----|-------|----------|-----------|-----------|------|------|-----|-----|-----|------|---------|-----|---------------------|------------------------|-----------|----------|---|---|---|---|
| BrS  | 1  | 28/01 | 62°39.02 | 59°00.11  | 0.1       | 2.4  | 30.3 | -   | -   | 3.7 | 3.7  | 2.5±0.2 | -   | -                   | -                      | -         | -        |   |   |   |   |
|      |    |       |          |           | 5         | 2.1  | 30.3 | 2.4 | -   | 3.4 | 5.6  | 2.3±0.6 | -   | -                   | -                      | -         | -        | - | - |   |   |
|      |    |       |          |           | 10        | 2.1  | 30.3 | 2.7 | -   | 3.2 | 2.4  | 2.4±0.7 | -   | -                   | -                      | -         | -        | - | - | - |   |
|      |    |       |          |           | <b>20</b> | 2.1  | 30.2 | 2.9 | -   | 3.1 | 2.7  | 1.7±0.6 | -   | -                   | -                      | -         | -        | - | - | - |   |
|      |    |       |          |           | 40        | 1.9  | 28.9 | 2.2 | -   | 3.1 | 4.8  | 1.9±0.2 | -   | -                   | -                      | -         | -        | - | - | - | - |
|      |    |       |          |           | 70        | 0.4  | 30.3 | 0.2 | -   | 4.1 | 6.2  | 0.4±0.3 | -   | -                   | -                      | -         | -        | - | - | - | - |
| Brs  | 2  | 29/01 | 61°59.59 | 55°40.54  | 0.1       | 1.8  | -    | -   | 0.5 | 3.7 | 2.3  | 0.9±0.1 | 0.3 | 4.4±0.03            | nd                     | 45.5±0.29 | 9.6±2.01 |   |   |   |   |
|      |    |       |          |           | 1         | -    | -    | -   | 3.8 | 4.2 | 2.2  | 1.2±0.0 | 0.7 | -                   | -                      | -         | -        | - |   |   |   |
|      |    |       |          |           | 5         | -    | -    | -   | 4.4 | 3.7 | 1.3  | 1.3±0.1 | 0.8 | -                   | -                      | -         | -        | - |   |   |   |
|      |    |       |          |           | 15        | 1.4  | 29.7 | 1.7 | 4.2 | 3.4 | 7.2  | 1.3±0.1 | 0.9 | -                   | -                      | -         | -        | - |   |   |   |
|      |    |       |          |           | <b>30</b> | 1.4  | 29.7 | 2.0 | 9.4 | 3.3 | 3.0  | 1.5±0.0 | 1.8 | 0.2±0.02            | 0.03±0.02              | 1.7±0.15  | 8.9±0.39 |   |   |   |   |
|      |    |       |          |           | 50        | 1.3  | 29.6 | 1.6 | 4.1 | 3.9 | 2.6  | 1.1±0.2 | 0.7 | -                   | -                      | -         | -        |   |   |   |   |
| WS   | 3  | 30/01 | 61°40.57 | 52°30.01  | 0.1       | 1.0  | -    | -   | -   | 3.5 | 1.5  | 2.2±0.2 | -   | -                   | -                      | -         | -        |   |   |   |   |
|      |    |       |          |           | 1         | 0.7  | -    | -   | -   | 3.7 | 2.2  | 1.8±0.9 | -   | -                   | -                      | -         | -        |   |   |   |   |
|      |    |       |          |           | 5         | 0.5  | 28.9 | 0.4 | -   | 2.9 | 1.3  | 2.3±0.0 | -   | -                   | -                      | -         | -        |   |   |   |   |
|      |    |       |          |           | 15        | 0.5  | 28.9 | 0.5 | -   | 3.7 | 0.7  | 2.1±0.1 | -   | -                   | -                      | -         | -        |   |   |   |   |
|      |    |       |          |           | <b>35</b> | 0.3  | 28.8 | 1.0 | -   | 3.1 | 3.4  | 2.2±0.2 | -   | -                   | -                      | -         | -        |   |   |   |   |
|      |    |       |          |           | 50        | 0.2  | 28.8 | 0.9 | -   | 3.0 | 4.5  | 1.0±0.1 | -   | -                   | -                      | -         | -        |   |   |   |   |
| WS   | 4  | 31/01 | 62°40.04 | 51°29.26  | 1         | 0.4  | -    | -   | -   | 4.3 | 2.7  | 1.9±0.2 | -   | -                   | -                      | -         | -        |   |   |   |   |
|      |    |       |          |           | 5         | 0.4  | -    | -   | -   | 2.4 | 1.2  | 2.4±0.6 | -   | -                   | -                      | -         | -        |   |   |   |   |
|      |    |       |          |           | 15        | -0.1 | 27.9 | 0.4 | -   | 2.3 | 2.2  | 1.9±0.9 | -   | -                   | -                      | -         | -        |   |   |   |   |
|      |    |       |          |           | <b>33</b> | -0.1 | 27.6 | 0.9 | -   | 3.6 | 1.3  | 2.3±0.9 | -   | -                   | -                      | -         | -        |   |   |   |   |
|      |    |       |          |           | 55        | -1.4 | 27.4 | 0.4 | -   | 3.2 | 0.7  | 0.4±0.1 | -   | -                   | -                      | -         | -        |   |   |   |   |
|      |    |       |          |           | 80        | -1.6 | 27.3 | 0.3 | -   | 1.3 | 2.3  | 0.1±0.0 | -   | -                   | -                      | -         | -        |   |   |   |   |
| WS   | 5  | 01/02 | 63°51.49 | 51° 51.47 | 0.1       | 0.1  | -    | -   | 2.5 | 2.0 | 0.5  | 1.8±0.3 | 1.0 | 1.0±0.2             | nd                     | 8.2±3.53  | 7.1±2.16 |   |   |   |   |
|      |    |       |          |           | 1         | -0.1 | -    | -   | 3.1 | 1.8 | 0.7  | 2.3±0.2 | 0.8 | -                   | -                      | -         | -        |   |   |   |   |
|      |    |       |          |           | 5         | -0.3 | -    | 0.5 | 3.0 | 1.8 | 5.1  | 2.4±0.1 | 0.7 | -                   | -                      | -         | -        |   |   |   |   |
|      |    |       |          |           | 20        | -0.3 | 27.7 | 0.8 | 3.9 | 2.9 | 1.7  | 2.1±0.2 | 1.0 | -                   | -                      | -         | -        |   |   |   |   |
|      |    |       |          |           | <b>35</b> | -0.5 | 27.7 | 0.8 | 4.0 | 2.6 | 0.6  | 1.9±0.1 | 1.2 | 0.2±0.05            | 0.8±0.00               | 1.8±0.39  | 8.5±1.37 |   |   |   |   |
|      |    |       |          |           | 60        | -1.5 | 27.6 | 0.7 | 3.2 | 4.1 | 11.3 | 0.9±0.0 | 0.9 | -                   | -                      | -         | -        |   |   |   |   |
| WS   | 6  | 02/02 | 63°55.46 | 53°52.32  | 0.1       | -0.4 | -    | -   | -   | 2.0 | 3.4  | 2.8±0.5 | -   | -                   | -                      | -         | -        |   |   |   |   |
|      |    |       |          |           | 1         | -    | -    | -   | -   | 1.9 | 1.8  | 1.8±0.0 | -   | -                   | -                      | -         | -        |   |   |   |   |
|      |    |       |          |           | 5         | -0.8 | -    | 0.6 | -   | 3.0 | 7.0  | 4.6±0.6 | -   | -                   | -                      | -         | -        |   |   |   |   |
|      |    |       |          |           | <b>20</b> | -1.0 | 27.4 | 0.9 | -   | 2.4 | 2.6  | 4.6±1.1 | -   | -                   | -                      | -         | -        |   |   |   |   |

| Site | St   | Date  | Lat      | Long     | Depth     | T    | S       | UF   | PF  | PA  | VA      | PHP±SE  | HF  | VP <sub>1</sub> ±SD | VP <sub>Lyso</sub> ±SD | RLC±SD    | GZ±SD     |
|------|------|-------|----------|----------|-----------|------|---------|------|-----|-----|---------|---------|-----|---------------------|------------------------|-----------|-----------|
| WS   | 6    | 02/02 | 63°55.46 | 53°52.32 | 30        | -1.1 | 27.5    | 0.7  | -   | 4.1 | 5.4     | 4.8±0.4 | -   | -                   | -                      | -         | -         |
|      |      |       |          |          | 50        | -1.4 | 27.5    | 0.6  | -   | 3.8 | 0.2     | 2.8±1.0 | -   | -                   | -                      | -         | -         |
|      |      |       |          |          | 80        | -1.7 | 27.4    | 0.5  | -   | 2.0 | 0.2     | 0.4±0.0 | -   | -                   | -                      | -         | -         |
| WS   | 7    | 03/02 | 65°01.10 | 55°45.26 | 0.1       | 0.1  | -       | -    | 1.8 | 5.7 | 27.4    | 4.9±0.3 | 2.7 | 3.5±0.34            | 16.5±0.00              | 27.4±0.27 | 6.0±1.76  |
|      |      |       |          |          | 1         | 0.0  | -       | -    | 3.5 | 6.3 | 7.5±0.3 | 3.0     | -   | -                   | -                      | -         |           |
|      |      |       |          |          | 5         | -0.2 | 27.9    | 14.6 | 5.3 | 5.4 | 22.1    | 6.3±0.7 | 1.5 | -                   | -                      | -         |           |
|      |      |       |          |          | 10        | -0.2 | 27.9    | 10.5 | 2.7 | 5.6 | 2.0     | 6.2±0.1 | 1.5 | -                   | -                      | -         |           |
|      |      |       |          |          | <b>20</b> | -1.1 | 27.4    | 14.4 | 3.4 | 4.5 | 19.6    | 5.0±0.6 | 5.1 | 1.9±0.02            | nd                     | 1.5±0.13  | 2.0±0.16  |
|      |      |       |          |          | 40        | -1.8 | 27.1    | 0.7  | 1.5 | 2.1 | 0.6     | 1.1±0.1 | 3.0 | -                   | -                      | -         |           |
| 80   | -1.8 | 27.1  | 0.2      | 1.1      | 1.6       | 0.6  | 0.4±0.0 | 1.6  | -   | -   | -       |         |     |                     |                        |           |           |
| WS   | 8    | 04/02 | 64°16.11 | 55°51.31 | 0.1       | 0.1  | -       | -    | -   | 4.4 | 4.5     | 3.2±0.4 | -   | -                   | -                      | -         | -         |
|      |      |       |          |          | 1         | 0.0  | -       | -    | -   | 3.7 | 2.2     | 4.8±0.4 | -   | -                   | -                      | -         |           |
|      |      |       |          |          | 5         | -0.2 | 28.4    | 6.7  | -   | 3.3 | 1.3     | 4.5±1.0 | -   | -                   | -                      | -         |           |
|      |      |       |          |          | 15        | -0.2 | 28.4    | 6.4  | -   | 3.6 | 0.7     | 3.7±1.1 | -   | -                   | -                      | -         |           |
|      |      |       |          |          | <b>25</b> | -0.2 | 28.4    | 6.0  | -   | 4.1 | 11.4    | 4.9±0.5 | -   | -                   | -                      | -         |           |
|      |      |       |          |          | 40        | -0.3 | 28.3    | 3.7  | -   | 3.4 | 12.1    | 2.6±0.5 | -   | -                   | -                      | -         |           |
| 80   | -0.7 | 28.0  | 0.7      | -        | 3.6       | 4.7  | 1.2±0.3 | -    | -   | -   | -       |         |     |                     |                        |           |           |
| WS   | 9    | 05/02 | 63°26.20 | 56°39.07 | 0.1       | 0.0  | -       | -    | -   | 3.3 | 1.3     | 1.6±0.1 | -   | -                   | -                      | -         | -         |
|      |      |       |          |          | 1         | -0.2 | -       | -    | -   | 2.6 | 3.0     | 0.9±0.1 | -   | -                   | -                      | -         |           |
|      |      |       |          |          | 5         | -0.4 | 28.3    | 0.4  | -   | 2.7 | 0.6     | 1.1±0.7 | -   | -                   | -                      | -         |           |
|      |      |       |          |          | 30        | -0.3 | 28.3    | 0.9  | -   | 2.7 | 1.6     | 1.4±0.1 | -   | -                   | -                      | -         |           |
|      |      |       |          |          | <b>50</b> | -0.4 | 28.3    | 1.2  | -   | 2.6 | 1.2     | 1.4±0.2 | -   | -                   | -                      | -         |           |
|      |      |       |          |          | 70        | -0.4 | 28.3    | 1.3  | -   | 3.1 | 0.3     | 1.5±0.1 | -   | -                   | -                      | -         |           |
| 90   | -0.5 | 28.2  | 0.7      | -        | 2.6       | 0.9  | 1.2±0.0 | -    | -   | -   | -       |         |     |                     |                        |           |           |
| BrS  | 10   | 06/02 | 62°10.38 | 57°14.25 | 0.1       | 2.1  | -       | -    | 2.8 | 4.2 | 7.9     | 2.6±0.3 | 1.7 | 1.7±0.07            | 0.2±0.02               | 13.3±0.55 | 14.9±3.89 |
|      |      |       |          |          | 1         | 1.9  | -       | -    | 3.0 | 4.6 | 2.2     | 3.0±0.1 | 0.8 | -                   | -                      | -         |           |
|      |      |       |          |          | 5         | 1.7  | 30.0    | 2.0  | 2.0 | 4.7 | 1.3     | 2.9±0.2 | 1.3 | -                   | -                      | -         |           |
|      |      |       |          |          | 15        | 1.7  | 29.9    | 2.3  | 2.2 | 4.2 | 0.7     | 3.0±0.2 | 1.7 | -                   | -                      | -         |           |
|      |      |       |          |          | <b>30</b> | 1.7  | 29.9    | 2.2  | 3.1 | 4.3 | 20.3    | 2.8±0.1 | 1.1 | 0.6±0.03            | 0.04±0.02              | 4.5±0.25  | 7.81±4.02 |
|      |      |       |          |          | 50        | 1.6  | 28.9    | 1.7  | 1.6 | 3.8 | 9.7     | 1.9±0.1 | 0.9 | -                   | -                      | -         |           |
| 70   | 0.7  | 29.2  | 0.4      | 0.9      | 3.0       | 5.0  | 0.4±0.0 | 0.3  | -   | -   | -       |         |     |                     |                        |           |           |
| BrS  | 11   | 07/02 | 62°25.28 | 58°10.05 | 1         | -    | -       | -    | -   | 5.9 | 12.9    | 2.2±0.3 | -   | -                   | -                      | -         | -         |
|      |      |       |          |          | 5         | 1.9  | 30.2    | 0.8  | -   | 6.4 | 15.7    | 1.9±0.0 | -   | -                   | -                      | -         |           |
|      |      |       |          |          | 15        | 1.9  | 30.1    | 2.9  | -   | 6.2 | 2.2     | 2.2±0.2 | -   | -                   | -                      | -         |           |
|      |      |       |          |          | <b>30</b> | 1.8  | 30.1    | 3.9  | -   | 5.8 | 1.3     | 1.9±0.3 | -   | -                   | -                      | -         |           |
|      |      |       |          |          | 50        | 1.7  | 30.0    | 2.9  | -   | 6.4 | 0.7     | 2.1±0.3 | -   | -                   | -                      | -         |           |
|      |      |       |          |          | 70        | 0.5  | 28.9    | 0.5  | -   | 2.6 | 6.0     | 0.3±0.0 | -   | -                   | -                      | -         |           |
| BrS  | 12   | 08/02 | 62°38.59 | 60°24.26 | 0.1       | 2.8  | -       | -    | -   | 6.5 | 17.9    | 4.5±0.1 | -   | -                   | -                      | -         | -         |
|      |      |       |          |          | 1         | -    | -       | -    | -   | 6.5 | 2.5     | 4.0±0.3 | -   | -                   | -                      | -         |           |
|      |      |       |          |          | 8         | -    | -       | -    | -   | 5.8 | 5.4     | 4.3±0.4 | -   | -                   | -                      | -         |           |
|      |      |       |          |          | 15        | 2.4  | 30.4    | 2.3  | -   | 2.0 | 17.9    | 4.1±0.2 | -   | -                   | -                      | -         |           |
|      |      |       |          |          | <b>20</b> | 2.2  | 30.3    | 2.1  | -   | 1.7 | 6.9     | 3.1±0.1 | -   | -                   | -                      | -         |           |
|      |      |       |          |          | 40        | 2.1  | 30.2    | 1.4  | -   | 3.1 | 8.7     | 1.5±0.2 | -   | -                   | -                      | -         |           |

| Site | St | Date  | Lat      | Long     | Depth | T    | S    | UF  | PF  | PA   | VA   | PHP±SE  | HF  | VP <sub>L</sub> ±SD | VP <sub>Lvso</sub> ±SD | RLC±SD    | GZ±SD     |
|------|----|-------|----------|----------|-------|------|------|-----|-----|------|------|---------|-----|---------------------|------------------------|-----------|-----------|
| BrS  | 12 | 08/02 | 62°38.59 | 60°24.26 | 70    | 2.0  | 30.1 | 1.1 |     | 4.6  | 6.9  | 1.4±0.0 |     | -                   |                        |           |           |
| BrS  | 13 | 09/02 | 63°33.58 | 61°16.06 | 0.1   | 2.1  | -    | -   | 3.1 | 6.5  | 2.5  | 2.6±0.4 | 2.5 | 0.7±0.03            | 0.3±0.18               | 7.5±0.35  | 10.2±3.78 |
|      |    |       |          |          | 1     | 1.9  | -    | -   | 3.6 | 6.5  | 4.6  | 2.2±0.3 | 2.1 | -                   | -                      | -         | -         |
|      |    |       |          |          | 5     | 1.7  | 29.9 | 3.1 | 6.3 | 5.8  | 6.0  | 2.3±0.1 | 2.6 | -                   | -                      | -         | -         |
|      |    |       |          |          | 15    | 1.7  | 29.9 | 2.8 | 3.8 | 2.0  | 1.8  | 2.3±0.1 | 1.9 | -                   | -                      | -         | -         |
|      |    |       |          |          | 30    | 1.5  | 29.7 | 2.2 | 5.0 | 1.7  | 0.9  | 1.4±0.1 | 1.7 | 0.1±0.00            | 0.1±0.05               | 1.6±0.04  | 8.9±0.12  |
|      |    |       |          |          | 40    | 1.2  | 29.5 | 1.7 | 1.7 | 3.1  | 4.7  | 0.2±0.1 | 0.4 | -                   | -                      | -         | -         |
|      |    |       |          |          | 70    | 0.3  | 28.8 | 0.2 | 1.4 | 4.6  | 2.5  | 0.1±0.1 | 0.3 | -                   | -                      | -         | -         |
| BeS  | 15 | 11/02 | 63°40.00 | 62°54.59 | 1     | -    | -    | -   | 1.7 | 10.4 | 1.1  | 2.3±0.2 | 0.8 | 0.4±0.00            | nd                     | 2.9±0.00  | 12.4±0.65 |
|      |    |       |          |          | 5     | 1.3  | 30.4 | 0.5 | 3.0 | 6.6  | 1.2  | 2.6±0.1 | 0.7 | -                   | -                      | -         | -         |
|      |    |       |          |          | 25    | 1.3  | 30.4 | 0.6 | 2.2 | 7.4  | 1.2  | 2.7±0.1 | 0.3 | -                   | -                      | -         | -         |
|      |    |       |          |          | 55    | 1.3  | 28.9 | 1.3 | 4.9 | 5.4  | 1.0  | 0.8±0.0 | 0.4 | 0.2±0.05            | 0.3±0.03               | 1.7±0.17  | 4.04±3.43 |
|      |    |       |          |          | 70    | 1.3  | 28.7 | 0.9 | 2.2 | 3.4  | 0.6  | 0.3±0.0 | 0.3 | -                   | -                      | -         | -         |
|      |    |       |          |          | 100   | 1.1  | 28.8 | 0.3 | 6.4 | 2.0  | 0.2  | 0.1±0.0 | 0.2 | -                   | -                      | -         | -         |
| BeS  | 16 | 12/02 | 65°03.14 | 66°56.25 | 0.1   | 3.2  | -    | -   | -   | 7.4  | 15.9 | 3.1±0.3 | -   | -                   | -                      | -         | -         |
|      |    |       |          |          | 1     | 3.1  | -    | -   | -   | 7.2  | 2.3  | 1.9±0.3 | -   | -                   | -                      | -         | -         |
|      |    |       |          |          | 5     | 2.9  | 30.6 | 0.3 | -   | 7.5  | 2.8  | 2.2±0.0 | -   | -                   | -                      | -         | -         |
|      |    |       |          |          | 25    | 2.5  | 30.3 | 0.4 | -   | 7.7  | 1.8  | 2.7±0.1 | -   | -                   | -                      | -         | -         |
|      |    |       |          |          | 50    | 0.4  | 28.6 | 0.7 | -   | 6.2  | 1.2  | 1.8±0.3 | -   | -                   | -                      | -         | -         |
|      |    |       |          |          | 70    | -0.2 | 28.2 | 0.5 | -   | 3.1  | 0.5  | 0.1±0.0 | -   | -                   | -                      | -         | -         |
|      |    |       |          |          | 100   | 0.0  | 28.6 | 0.2 | -   | 1.7  | 0.3  | 0.5±0.0 | -   | -                   | -                      | -         | -         |
| BeS  | 17 | 13/02 | 67°24.33 | 70°50.20 | 0.1   | 2.3  | -    |     | 1.0 | 3.4  | 3.4  | 2.3±0.1 | 1.0 | 0.3±0.01            | nd                     | 26.2±1.20 | 9.5±0.59  |
|      |    |       |          |          | 1     | -    | -    |     | 0.7 | 2.3  | 10.0 | 2.8±0.3 | 1.1 | -                   | -                      | -         | -         |
|      |    |       |          |          | 5     | -    | -    |     | 1.5 | 2.5  | 7.2  | 2.2±0.8 | 1.4 | -                   | -                      | -         | -         |
|      |    |       |          |          | 10    | 1.9  | 29.7 | 0.3 | 1.3 | 3.4  | 17.2 | 4.3±0.1 | 1.4 | -                   | -                      | -         | -         |
|      |    |       |          |          | 15    | 1.9  | 29.7 | 0.5 | 1.9 | 2.9  | 60.6 | 4.5±0.3 | 1.8 | -                   | -                      | -         | -         |
|      |    |       |          |          | 25    | 1.5  | 29.4 | 1.4 | 1.6 | 3.4  | 11.6 | 2.0±0.3 | 1.1 | 2.3±0.04            | nd                     | 18.2±0.30 | 5.3±0.35  |
|      |    |       |          |          | 60    | 2.3  | 28.3 | 0.2 | 0.5 | 3.7  | 11.7 | 0.4±0.1 | 0.3 | -                   | -                      | -         | -         |
| BeS  | 18 | 14/02 | 69°02.35 | 75°06.15 | 0.1   | -    | -    | -   | -   | 3.7  | 16.3 | 3.6±0.2 | -   | -                   | -                      | -         | -         |
|      |    |       |          |          | 1     | -    | -    | -   | -   | 5.0  | 7.9  | 2.0±0.3 | -   | -                   | -                      | -         | -         |
|      |    |       |          |          | 5     | 1.0  | 28.8 | 0.7 | -   | 4.2  | 3.9  | 2.3±0.1 | -   | -                   | -                      | -         | -         |
|      |    |       |          |          | 12    | 0.8  | 28.7 | 0.7 | -   | 4.0  | 6.5  | 3.3±0.1 | -   | -                   | -                      | -         | -         |
|      |    |       |          |          | 20    | -0.1 | 27.9 | 0.4 | -   | 4.6  | 12.3 | 1.7±0.1 | -   | -                   | -                      | -         | -         |
|      |    |       |          |          | 40    | -0.9 | 27.3 | 0.3 | -   | 4.1  | 2.0  | 0.6±0.0 | -   | -                   | -                      | -         | -         |
|      |    |       |          |          | 60    | -0.1 | 28.1 | 0.3 | -   | 4.6  | 11.4 | 0.7±0.1 | -   | -                   | -                      | -         | -         |
| BeS  | 19 | 15/02 | 69°33.09 | 74°31.28 | 0.1   | -    | -    | -   | -   | 2.4  | 35.6 | 4.0±0.4 | -   | -                   | -                      | -         | -         |
|      |    |       |          |          | 1     | -    | -    | -   | -   | 2.2  | 83.1 | 3.7±0.6 | -   | -                   | -                      | -         | -         |
|      |    |       |          |          | 5     | -1.5 | 26.2 | 3.3 | -   | 2.5  | 25.2 | 3.3±0.5 | -   | -                   | -                      | -         | -         |
|      |    |       |          |          | 12    | -1.0 | 26.8 | 2.6 | -   | 3.3  | 14.0 | 2.7±0.2 | -   | -                   | -                      | -         | -         |
|      |    |       |          |          | 20    | -0.4 | 27.4 | 1.1 | -   | 3.8  | 8.6  | 2.5±0.1 | -   | -                   | -                      | -         | -         |
|      |    |       |          |          | 30    | 0.4  | 28.3 | 1.4 | -   | 3.6  | 5.3  | 3.4±0.2 | -   | -                   | -                      | -         | -         |
|      |    |       |          |          | 50    | 0.1  | 28.1 | 0.6 | -   | 4.4  | 35.6 | 1.7±0.5 | -   | -                   | -                      | -         | -         |
| BeS  | 22 | 19/02 | 67°22.15 | 69°48.22 | 0.1   | 2.0  | -    | -   | -   | 5.0  | 6.7  | 2.2±0.1 | -   | -                   | -                      | -         |           |

| Site      | St   | Date  | Lat      | Long     | Depth     | T         | S       | UF       | PF       | PA  | VA        | PHP±SE   | HF | VP <sub>L</sub> ±SD | VP <sub>Lyso</sub> ±SD | RLC±SD | GZ±SD   |
|-----------|------|-------|----------|----------|-----------|-----------|---------|----------|----------|-----|-----------|----------|----|---------------------|------------------------|--------|---------|
| BeS       | 22   | 19/02 | 67°22.15 | 69°48.22 | 1         | 1.7       | -       | -        | -        | 4.6 | 5.7       | 1.4±0.2  | -  | -                   | -                      | -      | -       |
|           |      |       |          |          | 5         | 1.4       | 27.0    | 0.9      | -        | 5.1 | 5.4       | 1.5±0.1  | -  | -                   | -                      | -      | -       |
|           |      |       |          |          | 10        | 1.6       | 29.5    | 1.3      | -        | 5.1 | 13.3      | 1.6±0.4  | -  | -                   | -                      | -      | -       |
|           |      |       |          |          | <b>25</b> | 1.6       | 29.5    | 1.4      | -        | 5.0 | 8.0       | 2.1±0.2  | -  | -                   | -                      | -      | -       |
|           |      |       |          |          | 40        | 0.2       | 28.5    | 0.4      | -        | 4.9 | 9.0       | 2.0±0.1  | -  | -                   | -                      | -      | -       |
|           |      |       |          |          | 70        | -0.4      | 28.1    | 0.2      | -        | 2.1 | 2.8       | 0.3±0.0  | -  | -                   | -                      | -      | -       |
|           |      |       |          |          | BeS       | <b>23</b> | 20/02   | 66°01.59 | 67°10.03 | 1   | -         | -        | -  | 9.9                 | 10.9                   | 7.9    | 2.3±0.2 |
| 5         | 2.1  | 29.9  | 1.4      | 10.4     | 11.2      | 2.3       | 2.2±0.1 | 1.9      | -        | -   | -         | -        | -  | -                   | -                      |        |         |
| 10        | 2.1  | 29.9  | 1.3      | 9.1      | 11.4      | 4.6       | 2.3±0.2 | 1.6      | -        | -   | -         | -        | -  | -                   | -                      |        |         |
| <b>25</b> | 2.1  | 29.9  | 1.6      | 10.6     | 11.4      | 4.5       | 2.0±0.2 | 1.9      | 1.4±0.07 | nd  | 17.3±8.48 | 7.7±1.78 |    |                     |                        |        |         |
| 40        | 2.0  | 29.9  | 1.4      | 7.6      | 9.4       | 3.3       | 1.6±0.3 | 0.7      | -        | -   | -         | -        | -  | -                   |                        |        |         |
| 70        | -0.1 | 28.3  | 0.3      | 1.3      | 1.9       | 1.3       | 0.2±0.0 | 0.2      | -        | -   | -         | -        | -  | -                   |                        |        |         |
| BeS       | 24   | 21/02 | 64°56.28 | 64°32.14 | 0,1       | 2.0       | -       | -        | -        | 3.1 | 1.3       | 3.2±0.5  | -  | -                   | -                      | -      | -       |
|           |      |       |          |          | 1         | 2.2       | -       | -        | -        | 3.4 | 8.8       | 3.5±0.3  | -  | -                   | -                      | -      | -       |
|           |      |       |          |          | 5         | 2.5       | 30.3    | 4.1      | -        | 2.9 | 5.2       | 3.2±0.2  | -  | -                   | -                      | -      | -       |
|           |      |       |          |          | <b>15</b> | 2.4       | 30.3    | 4.9      | -        | 3.8 | 20.0      | 3.0±0.3  | -  | -                   | -                      | -      | -       |
|           |      |       |          |          | 25        | 2.3       | 30.2    | 2.6      | -        | 3.7 | 15.4      | 2.5±0.0  | -  | -                   | -                      | -      | -       |
|           |      |       |          |          | 32        | 2.3       | 30.2    | 1.6      | -        | 3.7 | 45.5      | 2.5±0.1  | -  | -                   | -                      | -      | -       |
|           |      |       |          |          | 50        | 1.5       | 29.8    | 0.2      | -        | 3.2 | 43.2      | 0.7±0.0  | -  | -                   | -                      | -      | -       |
| BrS       | 26   | 23/02 | 63°02.35 | 57°32.07 | 0,1       | -0.5      | -       | -        | -        | 2.6 | 2.5       | 0.8±0.1  | -  | -                   | -                      | -      | -       |
|           |      |       |          |          | 1         | -0.5      | -       | -        | -        | 2.3 | 7.7       | 1.2±0.2  | -  | -                   | -                      | -      | -       |
|           |      |       |          |          | 5         | -0.6      | 28.1    | 0.5      | -        | 2.3 | 8.6       | 1.0±0.1  | -  | -                   | -                      | -      | -       |
|           |      |       |          |          | 20        | -0.6      | 28.1    | 0,6      | -        | 2.5 | 6.2       | 1.1±0.2  | -  | -                   | -                      | -      | -       |
|           |      |       |          |          | <b>30</b> | -0.6      | 28.1    | 0,6      | -        | 2.2 | 14.9      | 0.8±0.1  | -  | -                   | -                      | -      | -       |
|           |      |       |          |          | 55        | -0.6      | 28.1    | 0,5      | -        | 2.2 | 9.1       | 0.8±0.1  | -  | -                   | -                      | -      | -       |
|           |      |       |          |          | 80        | -0.8      | 28.0    | 0,3      | -        | 1.8 | 2.9       | 0.1±0.1  | -  | -                   | -                      | -      | -       |
| WS        | 27   | 24/02 | 63°05.08 | 54°46.14 | 1         | -0.6      | 27.6    | 0.6      | -        | 2.0 | 8.1       | 1.6±0.2  | -  | -                   | -                      | -      | -       |
|           |      |       |          |          | 5         | -0.6      | 28.1    | 1.0      | -        | 1.6 | 5.1       | 1.6±0.2  | -  | -                   | -                      | -      | -       |
|           |      |       |          |          | 15        | -0.6      | 28.1    | 1.3      | -        | 1.5 | 5.7       | 1.3±0.1  | -  | -                   | -                      | -      | -       |
|           |      |       |          |          | <b>30</b> | -0.6      | 28.1    | 2.0      | -        | 1.5 | 8.7       | 1.4±0.1  | -  | -                   | -                      | -      | -       |
|           |      |       |          |          | 50        | -0.5      | 28.1    | 1.6      | -        | 1.6 | 10.4      | 1.3±0.4  | -  | -                   | -                      | -      | -       |
|           |      |       |          |          | 80        | -0.5      | 28.1    | 1.3      | -        | 1.6 | 6.6       | 1.7±0.3  | -  | -                   | -                      | -      | -       |
|           |      |       |          |          | WS        | 28        | 25/02   | 64°57.01 | 55°50.00 | 0,1 | -0.8      | -        | -  | -                   | 5.4                    | 3.0    | 9.5±0.8 |
| 1         | -0.8 | -     | -        | -        | -         | 4.5       | 6.3±0.8 | -        | -        | -   | -         | -        | -  |                     |                        |        |         |
| 5         | -0.7 | 27.6  | 0.4      | -        | -         | 2.1       | 7.0±0.3 | -        | -        | -   | -         | -        |    |                     |                        |        |         |
| 18        | -0.8 | 27.6  | 1.5      | -        | -         | 2.7       | 6.2±0.5 | -        | -        | -   | -         | -        |    |                     |                        |        |         |
| <b>35</b> | -1.5 | 27.3  | 2.0      | -        | -         | 0.3       | 4.7±0.2 | -        | -        | -   | -         | -        |    |                     |                        |        |         |
| 45        | -1.7 | 27.2  | 1.0      | -        | -         | 0.5       | 2.3±0.3 | -        | -        | -   | -         | -        |    |                     |                        |        |         |
| 60        | -1.8 | 27.2  | 0.3      | -        | -         | 0.2       | 0.7±0.1 | -        | -        | -   | -         | -        |    |                     |                        |        |         |
